# Supplementary material for: High Daytime Temperature Responsive MicroRNA Profiles in Developing Grains of Rice Varieties with Contrasting Chalkiness
Source: MDPI journal article supplement (doi:10.3390/ijms241411631), 2023-07-19
Supplement: s1 [file s1]

|                   |   |                       |    |
|-------------------|---|-----------------------|----|
| canH-miR169       | 1 | agccaagggaugacuugccgg | 20 |
|                   |   |                       |    |
| osa-miR169b/c/e   | 2 | agccaagggaugacuugccgg | 21 |
| canH-miR11339-5p  | 2 | gcaugcccauauucacauag  | 22 |
|                   |   |                       |    |
| osa-miR11339-5p   | 1 | gcaugcccacauucauauag  | 21 |
| canH-miR2905-3p   | 4 | acaugucaaugacaaaggca  | 23 |
|                   |   |                       |    |
| osa-miR2905       | 2 | acaugucagugacaaaggca  | 21 |
| canH-miR9774ab-3p | 3 | caagauauuggguauuucuuu | 23 |
|                   |   |                       |    |
| tae-miR9774       | 1 | caagauauuggguauuucugu | 21 |
