# Supplementary material for: High Daytime Temperature Responsive MicroRNA Profiles in Developing Grains of Rice Varieties with Contrasting Chalkiness
Source: MDPI journal article supplement (doi:10.3390/ijms241411631), 2023-07-19
Supplement: s1 [file s1]

## canN-01

```
c--      g          G-|      C          A          gcga
   ucugac uacugcccucugAU  UGGGU GCUGACAU UGGGCCc  \
   ggauug augacgggagACUG  ACUCA CGACUGUA ACCCggg  g
cua      a          AA^      C          C          gauc
```

## canN-01 Homologue in *Brachypodium distachyon*

```
----|      a  u          u  c  a
   guga gu acuucaccugacuuugggugggcugacauguggg cc acg \
   cacu ca ugaaguggacugaaaccaccgacuguacaccc gg ugc c
aagu^      g  u          -  u  c
```

## canN-02

```
-  -|          a  uU          U          AUA      ga-      uu      ag  gua
   uc caaaauauagcaac ug  ACUCGA UAGAUACCACCUA  acua  gggucua uagauu ua  c
   ag guuuuauaucguug aU  UGAGCU AUCUGUGGUGGAU  ugau  cuuagau aucuga gu  u
u  c^          g  UU          C          Ca-      aug      cu      gg  gga
```

## canN-03

```
---          ag          UAG          C  c  g  a-----|      a  a
   cucccuuuguccca  aaaaACUCAGCC  GAGGGGAUG GAC ccu cuag  gaaucugg cag g
   gagggaggcaggggu uuUUUGAGUUGG  CUCCCCUAC Cug gga gauc  cuuagacc guu g
uau          a-          CUA          A  a  g  auguug^      g  g
```

## canN-04

```
a          c--  uuc          C  -|  A          G  Aauc--  a          u  ugac
   ggcaggau  ac  uguggGGAC AU CC CAUGUGAGGA CU  cca ccaucuau uagc  \
   ucguccua  ug  auaCCUCUG UA GG GUGCACUCCU GA  ggu gguagaua auug  a
g          cuu  uau          A  C^  -          -  aucaau  c          c  ugua
```

## canN-05

```
-          -|  c  c  -          UUA  C          A  aa  ucag
   guuuuacg gu cuug aagu UACUAGAG  CUU CACUUUG Ag  aua  \
   caaaaugc ca gaac uuuA AUGAUCUC  GGA GUGAAAU uc  uau  c
a          a^  a  -          C          CAC  U          c  gc  uuac
```

## canN-06

ua-- a a cc U a cac --| g cg  
uuca cu aucaugug AAUGGCUUG CUUGUUUGUGUGCcau aaaaa uaggcu ca uu g  
aagu ga uaguacac UUACUGAAC GAGCAAAACGCacggua uuuuu guucgg gu ag a  
gaac c c UA C g aa- uu^ g ua

## canN-07

g--- g ag cc G G AU .-Auuca u- - -| c  
gcg cagc gccau ccUCGCCGC GCU GC CAGC gcag ggc gca cggc g  
ugu gucg cggua GGAGCGGCG CGA CG GUCg cguc ucg cgu gccg c  
auga g g- ca G G CG \ ----- uc u g^ c

## canN-08

--| cc c aua C U gauu a gua- c  
aucaag au acaga cGAA UGCAUGGGAAAUUUUG Ug gguc gg guc a  
uaguuu ua ugucu GCUU ACGUACCUUUUAAAAC gc ccag cc cag u  
aa^ cu c aaA C c agau - aagg g

## canN-09

--| cc c aua GG U gauu a gua- c  
aucaaa au acaga cGAAGUGCAUGG AAUUUUG Ug gguc gg guc a  
uaguuu ua ugucu GCUUCACGUACC UUAAGC ac ccag cc cag u  
aa^ cu c aaA UU c agau - aagg g

## canH-miR169

a--- c a c UG - .-C g  
gagg agagagcagg ug AGCCAAGGA A CUUGCCGG cggc a  
cucu ucucucguuc aC UCGGUUCCU U GAACGGC gccg u  
ucug - c A GU U \ - g

## canH-miR2905

- c -| g A C AG c u  
cucu uaguc acu caucguGUCUUU UCA UGACAUGU GCC gaug \  
gaga gucag uga guggCACGGAAA AGU ACUGUACA Cgg cugc g  
g c c^ a C A CU - u

### canH-miR9774a

Initial  $\Delta G = -37.80$

```
          10          20          30          40
uu---| ug   a          cu          U
      uu  aag aaggaaag  AGAAAUACCCAAUAUCUUGC  G
      aa  uu  uuuuuuuU  UCUUUAUGGGUUAUAGAACG  A
uuucu^ gu   a          U-          A
      80          70          60          50
```

### canH-miR9774b

Initial  $\Delta G = -36.80$

```
          10          20          30          40
uu----| ug   a          cu          U
      uu  aag aaggaaag  AGAAAUACCCAAUAUCUUGC  G
      aa  uu  uuuuuuuU  UCUUUAUGGGUUAUAGAACG  A
cuuucu^ gu   a          --          A
      80          70          60          50
```

### canH-miR11339

Initial  $\Delta G = -58.40$

```
          10          20          30          40          50          60
--|    g          c          C          C  G          a          cacac
  uuca guuauaagauuuu uAGCAUUG  CCAUAUUCA  AUA  AUguu augaauauagg  a
  aagu uaauauucugaaa  AUCGUAAC  GGUGUAAGU  UAU  uacaa uacuuagaucu  u
ca^    a          A          C          A  A          c          auaua
130          120          110          100          90          80          70
```
